1 **Title: Psychosocial factors at work and fertility and menstrual disorders: a systematic**  
2 **review**

3  
4 **Authors (one academic degree)**

5 **Natsu SASAKI, MD**; nasasaki-ky@umin.ac.jp

6 Department of Mental Health, Graduate School of Medicine, The University of Tokyo, Tokyo,  
7 Japan.

8 Department of Public Mental Health Research, National Institute of Mental Health, National  
9 Center of Neurology and Psychiatry, Tokyo, Japan.

10 **Kotaro IMAMURA, PhD\***; kouima-ky@umin.ac.jp

11 Department of Mental Health, Graduate School of Medicine, The University of Tokyo, Tokyo,  
12 Japan.

13 **Kazuhiro WATANABE, PhD**; kzwatanabe-ky@umin.ac.jp

14 Department of Public Health, Kitasato University School of Medicine, Japan

15 **Yui HIDAHA, MS**; yuihidaka-ky@umin.ac.jp

16 Department of Mental Health, Graduate School of Medicine, The University of Tokyo, Tokyo,  
17 Japan.

18 Japan Society for the Promotion of Science, Tokyo, Japan.

19 **Asuka SAKURAYA, PhD**; sakuraya.asuka@twmu.ac.jp

20 Division of Public Health, Department of Hygiene and Public Health, School of Medicine,  
21 Tokyo Women's Medical University, Tokyo, Japan

22 **Emiko ANDO, PhD**; emikoando73@gmail.com

23 Institute for Cancer Control, National Cancer Center Japan.

24 **Hisashi EGUCHI, MD**; eguchi@med.uoeh-u.ac.jp

25 Department of Mental Health, Institute of Industrial Ecological Sciences, University of  
26 Occupational and Environmental Health, Japan, Kitakyushu, Japan.

27 **Akiomi INOUE, PhD**; akiomi@med.uoeh-u.ac.jp (system registry; akiomi-ky@umin.ac.jp)

28 Institutional Research Center, University of Occupational and Environmental Health, Japan,  
29 Kitakyushu, Japan.

30 **Kanami TSUNO, PhD**; ktsuno-ky@umin.ac.jp

31 School of Health Innovation, Kanagawa University of Human Services, Kawasaki, Japan

32 **Yu KOMASE, PhD**; kmsy-ky@umin.ac.jp

33 Department of Mental Health, Graduate School of Medicine, The University of Tokyo, Tokyo,  
34 Japan.

35 **Mako IIDA, MS**; imako-ky@umin.ac.jp

36 Department of Psychiatric Nursing, Graduate School of Medicine, The University of Tokyo,

37 Tokyo, Japan.

38 **Yasumasa OTSUKA, PhD**; [otsuka@human.tsukuba.ac.jp](mailto:otsuka@human.tsukuba.ac.jp)

39 Faculty of Human Sciences, University of Tsukuba, Tokyo, Japan

40 **Mai IWANAGA, PhD**; [maii-ky@umin.ac.jp](mailto:maii-ky@umin.ac.jp)

41 Department of Psychiatric Nursing, Graduate School of Medicine, The University of Tokyo,  
42 Tokyo, Japan.

43 **Yuka KOBAYASHI, PhD**; [yuka-kobayashi@umin.ac.jp](mailto:yuka-kobayashi@umin.ac.jp)

44 Department of Mental Health, Graduate School of Medicine, The University of Tokyo, Tokyo,  
45 Japan.

46 **Reiko INOUE, MD**; [dm18003@st.kitasato-u.ac.jp](mailto:dm18003@st.kitasato-u.ac.jp)

47 Department of Public Health, Kitasato University School of Medicine, Sagamihara, Japan.

48 **Akihito SHIMAZU, PhD**; [ashimazu-ky@umin.ac.jp](mailto:ashimazu-ky@umin.ac.jp)

49 Faculty of Policy Management, Keio University, Japan

50 **Akizumi TSUTSUMI, MD**; [akizumi@kitasato-u.ac.jp](mailto:akizumi@kitasato-u.ac.jp)

51 Department of Public Health, Kitasato University School of Medicine, Sagamihara, Japan.

52 **Norito KAWAKAMI, MD**; [nkawakami@m.u-tokyo.ac.jp](mailto:nkawakami@m.u-tokyo.ac.jp)

53 Department of Mental Health, Graduate School of Medicine, The University of Tokyo, Tokyo,  
54 Japan.

55

56

57 \* Correspondence to: **Kotaro IMAMURA, PhD**.

58 Department of Mental Health, Graduate School of Medicine, The University of Tokyo, Tokyo,  
59 Japan

60 7-3-1, Hongo, Bunkyo-ku, Tokyo, 113-0033, JAPAN

61 Tel: +81-3-5841-3612 Fax: +81-3-5841-3392 E-mail: [kouima-ky@umin.ac.jp](mailto:kouima-ky@umin.ac.jp)

62

63

64 **Condensation**

65 This systematic review evaluated the association between psychosocial factors at work and  
66 fertility and menstrual disorders.

67

68 **Short Title**

69 psychosocial factors at work and fertility and menstrual disorders

70

71 **A. Why was this study conducted?**

72 ● The longitudinal studies which examined the associations between psychosocial factors at  
73 work and menstrual abnormalities or fertility have not been systematically presented yet.

74 **B. What are the key findings?**

75 ● The outcomes were fertility (n=3), early menopause (n=1), endometriosis (n=1), and serum  
76 hormones (n=1), in the included six studies.

77 ● All the study (n=3) that examined the association of night shift/rotating work with fertility  
78 outcomes showed no significant difference.

79 **C. What does this study add to what is already known?**

80 ● This review revealed insufficient high-level evidence on the association of psychosocial  
81 factors at work and menstrual abnormalities.

82

83 **KEYWORDS:** biopsychosocial medicine; endocrine; gynecology; occupational health;  
84 reproductive health.

85

86

87 **Statement of authorship**

88 **Acknowledgment**

89 The authors wish to thank Dr. Daisuke Shigemi (obstetrician-gynecologist) for a valuable suggestion  
90 on the variable selection.

91

92 **Author's contribution**

93 NS, KI, KW, EM, HE, AI, KT, YH, YKom, Mli, YO, ASa, YA, MIw, YKob, RI, ASH, AT, and NK  
94 substantially contributed to the conception and design of the study, writing of the protocol, and  
95 revising it critically for important intellectual content. All authors approved the final version of the  
96 manuscript.

97

98 **Funding statement**

99 This study is supported by The University of Tokyo Occupational Mental Health (TOMH) Research  
100 Fund, obtained from the Department of Mental Health, Graduate School of Medicine, The  
101 University of Tokyo, Japan.

102

103 **Role of the Funder/Sponsor:** The sponsors had no role in the design and conduct of the study;  
104 collection, management, analysis, and interpretation of the data; in the preparation, review, or  
105 approval of the manuscript; and in the decision to submit the manuscript for publication.

106

107 **Registry and registration number of the study/trial:** The study protocol was registered at the  
108 UMIN registry (registration number: UMIN000039488). The registration date is 14th Feb 2020.

109 URL: [https://upload.umin.ac.jp/cgi-bin/ctr/ctr\\_view\\_reg.cgi?recptno=R000044704](https://upload.umin.ac.jp/cgi-bin/ctr/ctr_view_reg.cgi?recptno=R000044704)

110

111 **Conflict of interest:** All authors declare no conflict of interest related the submitted work.

112

113 **Data availability statement:** All data produced in the present study are available upon reasonable  
114 request to the authors.

115

116

117 **Abstract**

118 **Objective:** This systematic review aimed to evaluate the association between psychosocial  
119 factors at work and menstrual abnormalities or fertility by collecting the literature that had  
120 utilized a longitudinal or prospective cohort design.

121 **Data sources:** MEDLINE, EMBASE, PsycINFO, PsycARTICLES, and Japan Medical  
122 Abstracts Society electronic databases were searched for published studies from inception to  
123 26th February 2020.

124 **Study eligibility criteria:** The inclusion criteria for this systematic review were defined as  
125 follows: (P) Adult female workers (over 18 years old), (E) Presence of adverse psychosocial  
126 factors at work, (C) Absence of adverse psychosocial factors at work, and (O) Any menstrual  
127 cycle disorders, menstrual-related symptoms, or fertility. The study design was limited to  
128 prospective/longitudinal studies.

129 **Study appraisal and synthesis methods:** The included studies were descriptively summarized  
130 in a narrative format.

131 **Results:** Database searching yielded 12,868 abstracts. After the screening process, six studies  
132 were included. The outcomes were fertility (n=3), early menopause (n=1), endometriosis (n=1),  
133 and serum hormones (n=1). Three included studies presented significant findings: women with  
134 high job demands were significantly less likely to conceive; working over 40 hours per week  
135 and lifting or moving a heavy load >15 times per day significantly increased the duration of  
136 pregnancy attempts; women with rotating night shift work had increased risk of earlier  
137 menopause. All the study (n=3) that examined the association of night shift/rotating work with  
138 fertility outcomes showed no significant difference. No study investigated the association of  
139 psychosocial factors at work with menstrual abnormality.

140 **Conclusion:** This review revealed insufficient high-level evidence on the association of

141 psychosocial factors at work with fertility and menstrual disorders. Future well-designed studies  
142 are needed.

143 **Trial registration:** The study protocol was registered at the UMIN registry (registration  
144 number: UMIN000039488). The registration date is 14th Feb 2020.

145 URL: [https://upload.umin.ac.jp/cgi-bin/ctr/ctr\\_view\\_reg.cgi?recptno=R000044704](https://upload.umin.ac.jp/cgi-bin/ctr/ctr_view_reg.cgi?recptno=R000044704)

146 **Review protocol:** Protocol paper is available in preprint format.

147 URL:[https://assets.researchsquare.com/files/rs-179301/v1/48845b10-5ec4-4d48-8918-3dcf0e0e](https://assets.researchsquare.com/files/rs-179301/v1/48845b10-5ec4-4d48-8918-3dcf0e0e-dded.pdf?c=1631873381)  
148 [dded.pdf?c=1631873381](https://assets.researchsquare.com/files/rs-179301/v1/48845b10-5ec4-4d48-8918-3dcf0e0e-dded.pdf?c=1631873381)

149

150

151 **Introduction**

152 Menstrual abnormalities are a crucial issue in women's health. Menstrual cycle  
153 irregularities increased the risk of premature death,<sup>1</sup> ovarian and breast cancer,<sup>2,3</sup>  
154 cardiovascular disease,<sup>4</sup> and diabetes.<sup>5</sup> Moreover, fertility is essential for reproductive  
155 health and rights among preconceptual working-aged women. Menstrual characteristics  
156 and fertility are thus important indicators in occupational health settings.

157 Menstrual cycle and ovarian functions are regulated by sex hormones (i.e., the  
158 hypothalamic-pituitary-ovarian [HPO] axis); however, they are often disrupted by  
159 psychosocial factors<sup>6,7</sup> through activation of the hypothalamic-pituitary-adrenal [HPA]  
160 axis.<sup>8</sup> Psychosocial factors at work provide potential risks of activating the HPA axis  
161 and releasing cortisol due to psychological stress reactions, leading to menstrual  
162 disorders. For instance, some literature showed significant associations: low job control,  
163 co-worker support, and job security with high menstrual pain,<sup>9</sup> low supervisor support  
164 with menopausal symptoms,<sup>10</sup> strenuous work with premenstrual symptoms,<sup>11,12</sup> work  
165 schedule variability with irregular cycles,<sup>13,14</sup> time pressure and fast work speed with  
166 perimenstrual symptoms,<sup>15</sup> and job strain (a combination of high job demands and low  
167 job control) with cycle length irregularities.<sup>16</sup> The study design of many of them was  
168 cross-sectional, leading to limited evidence and suggestions for appropriate practices in  
169 the women's occupational health field.

170 The HPA-HPO axis interaction is affected by circadian sleep control,<sup>17,18</sup> The  
171 relation between night/shift work and menstrual disorders has been thus often described,  
172 and a meta-analysis by Stocker et al. (2014),<sup>19</sup> which included a cross-sectional design,  
173 showed that shift work increased the risk of menstrual disruption and infertility<sup>19</sup>.  
174 However, more recent literature showed inconsistent results in the association of shift

175 work with ovarian function.<sup>20-22</sup> Lim et al. (2016) reported no association between shift  
176 work and ovarian functions or menstrual disorders in a cross-sectional design.<sup>20</sup> In  
177 contrast, Minguez-Alarcon et al. (2017) reported that non-day work schedules were  
178 inversely related to oocyte production and quality among women receiving fertility  
179 treatment in a cross-sectional design.<sup>21</sup> Only one longitudinal study by Albert-Sabater et  
180 al. (2016) reported that nurses on the rotating shift did not show an increased risk of  
181 having menstrual disorders compared with day staff.<sup>22</sup> Since most studies were adopted  
182 a cross-sectional design (i.e., one cycle was treated as one individual outcome), the  
183 topics of shift work with menstruation require further investigations.

184 The association between psychosocial factors at work and menstrual  
185 abnormalities or fertility has not been systematically presented yet. Longitudinal studies  
186 should be summarized for concrete conclusions. The aim of this systematic review was  
187 thus to investigate whether psychosocial factors at work impact menstrual  
188 characteristics or fertility, limiting the literature that has utilized a longitudinal or  
189 prospective cohort design, assessing the outcome both at baseline and follow-up.

190

## 191 **Method**

### 192 **Study design**

193 The method was reported according to the Preferred Reporting Items for Systematic  
194 Review and Meta-Analysis (PRISMA 2020) guidelines.<sup>23</sup> The study protocol has been  
195 registered at the UMIN registry (registration number: UMIN000039488 URL:  
196 [https://upload.umin.ac.jp/cgi-bin/ctr/ctr\\_view\\_reg.cgi?recptno=R000044704](https://upload.umin.ac.jp/cgi-bin/ctr/ctr_view_reg.cgi?recptno=R000044704)). The  
197 registration date is 14th Feb 2020. The protocol paper has been available elsewhere.<sup>24</sup>

198



199 **PECO and Eligibility criteria**

200 The eligible participants, exposures, comparisons, and outcomes (PECO) of this  
201 systematic review are listed in **Table 1**. PECO was: P: adult female workers (over 18  
202 years old), E: adverse psychosocial factors at work (+), C: adverse psychosocial factors at  
203 work (-), and O: menstrual disorders, related symptoms, reproductive outcomes. The  
204 study design was restricted only longitudinal or prospective manner. The study was also  
205 excluded if the cross-sectional analysis method was applied, even if the study used a  
206 longitudinal design. The language was limited to English or Japanese.

207

208 **Search and Information Sources**

209 Databases including PubMed (MEDLINE), Embase, PsycINFO, PsycARTICLES, and  
210 the Japan Medical Abstract Society database were searched for publications from  
211 inception to 26<sup>th</sup> February 2020. The details of the search terms are shown in **Appendix**  
212 **1**. The search terms for psychosocial factors at work were defined based on the previous  
213 meta-analysis.<sup>25-28</sup> The search terms for outcome variables were initially selected by an  
214 investigator (NS) who reviewed previous systematic reviews handling menstrual-related  
215 health.<sup>19,29-32</sup> The medical doctor in obstetrics and gynecology (outside the research  
216 members) confirmed the search terms before searching. The terms were amended to  
217 exclude infectious, inflammatory disease, and pelvic organ prolapse due to the lack of  
218 probability that psychosocial work-related factors cause these.

219

220 **Study selection**

221 Microsoft Excel (Washington, USA) was used to manage all identified studies. An  
222 investigator (NS) excluded duplicate records. The remaining articles were shared with

223 16 investigators (NS, KI, KW, EM, HE, AI, KT, YH, YKom, MIi, YO, ASa, YA, MIw,  
224 YKob, and RI); Pairs of them independently assessed the title and abstract of each  
225 article according to the eligibility criteria (shifting phase: first screening). Subsequently,  
226 two investigators independently reviewed the full texts that were included in the first  
227 screening. Any disagreements were discussed until reaching a consensus by all authors.  
228 The reasons why studies were excluded were recorded during the full-text review phase.

229

### 230 **Data collection process and data items**

231 Data were extracted independently from eligible articles by 16 investigators (NS, KI,  
232 KW, EM, HE, AI, KT, YH, YKom, MIi, YO, ASa, YA, MIw, YKob, and RI). An  
233 investigator (NS) integrated and formatted the information on publication year, study  
234 design, the country of study origin, the number of participants completing the baseline  
235 survey and included in the statistical analysis, demographic characteristics of the  
236 participants (i.e., age, occupation), the length of follow-up and attrition rate, exposure  
237 variables (i.e., adverse psychosocial factors at work), and outcome variables (i.e.,  
238 menstrual abnormalities, fertility).

239

### 240 **Risk of Bias in individual Studies**

241 The risk of bias in observational studies of exposures (ROBINS-I) tool was used to  
242 assess the quality of included studies. Investigators (NS, KI, KW, ASa, and YH)  
243 independently scored the bias classified as low, high, or unclear. Discrepancies in  
244 quality assessment among the investigators were solved by discussion and consensus  
245 among all authors. A Summary of Findings (SoF) will be created using the Grading of  
246 Recommendations, Assessment, Development and Evaluation (GRADE) approach to

247 grade the certainty of evidence.

248

## 249 **Synthesis of Results and Meta-Analysis**

250 For the main analysis, we synthesized all types of psychosocial factors at work and all  
251 types of menstrual-related disorders/symptoms. Meta-analysis was conducted if at least  
252 three eligible studies were found to have the same outcome. If a meta-analysis was not  
253 appropriate (i.e., only two or fewer studies were eligible and included), the results were  
254 presented in a narrative format.

255

## 256 **Changes to the protocol**

257 To examine the association between exposure and outcome longitudinally, the study  
258 applied a cross-sectional fashioned analysis (i.e., one menstrual cycle was treated as an  
259 individual unit of outcome) was excluded.

260

## 261 **Result**

### 262 **Database searching**

263 Database searching yielded 12,868 abstracts (PubMed n = 2,823, EMBASE n = 9,340,  
264 PsycINFO n = 608, Japan Medical Abstracts Society n = 97). After removing 1,435  
265 duplicates, 11,433 records were included in the first screening, after which 11,395  
266 records were excluded, and 38 records proceeded to full-text screening. Subsequently,  
267 32 studies that did not meet the criteria for design (n=13),<sup>11-16,20-22,33-36</sup> participants  
268 (n=4),<sup>37-40</sup> exposures (n=10),<sup>41-50</sup> outcomes (n=2),<sup>51,52</sup> article type (n=1),<sup>53</sup> and  
269 duplicates (n=2) were excluded. Finally, six studies were included in the systematic  
270 qualitative review.<sup>54-59</sup> The meta-analysis was not conducted due to insufficient studies

271 based on our protocol. The flowchart of study selection is shown in **Figure 1**.

272

### 273 **Study description**

274 The characteristics of the six included studies are shown in **Table 2**. Three studies  
275 treated fertility outcomes.<sup>55,57,59</sup> Earlier menopause,<sup>56</sup> and incident diagnosis of  
276 endometriosis,<sup>58</sup> and serum reproductive hormone<sup>54</sup> were each measured by one study.  
277 No study was found which outcome was menstrual abnormalities. Three of the six  
278 studies retrieved their data from the nurse's health study (NHS). All studies measured  
279 shift work as an adverse psychosocial factor at work. Each study reported job  
280 demands<sup>59</sup> and long working hours.<sup>57</sup>

281

282 Although authors designed the protocol to conduct a meta-analysis if at least three  
283 eligible studies were found with the same outcome, fertility outcomes of included  
284 studies varied, and it was difficult to synthesize the findings: time to pregnancy,<sup>55</sup> the  
285 current duration of participants' ongoing pregnancy attempt,<sup>57</sup> and conception.<sup>59</sup>

286

287 Regarding the three studies focusing on fertility outcomes, Barzilai-Pesach et al.  
288 (2006)<sup>59</sup> prospectively evaluated the association between women's occupational stress  
289 factors (i.e., job demands, decisional latitude, shift work, and working hours, measured  
290 using a self-reported questionnaire) and the outcome of fertility treatments. They  
291 followed 75 women (mean age = 31.3) who had worked at least three months before  
292 intake, had a female fertility problem and attended fertility clinics between 1999 and  
293 2000. Information regarding the outcome of fertility treatments was based on a  
294 follow-up 18 months after the initial intake through fertility clinics. Women with high

295 job demands were less likely to conceive (relative risk [RR] = 0.60 [95% confidence  
296 interval [CI]: 0.42 to 0.96]). There was no significant association of decision latitude,  
297 shift work, or working hours with conception. Gaskins et al. (2015)<sup>57</sup> evaluated the  
298 association of work schedule (i.e., work hours and total duration of night shift work)  
299 and physical factors (i.e., standing job and lifting load) with fecundity (i.e., current  
300 duration of participants' ongoing pregnancy attempts) among female nurses, using the  
301 data from an internet-based cohort study of female nurses in the USA and Canada (NHS  
302 3). For assessment of fecundity, the authors took a participant's first report of ongoing  
303 pregnancy attempt after the baseline questionnaire as her outcome in three follow-up  
304 survey questionnaires conducted every six months. As a result, 1,739 women (median  
305 age = 33) were included in this analysis. Long working hours (over 40 hours per week)  
306 and lifting or moving a heavy load (>15 times per day) were related to a longer median  
307 duration of pregnancy attempts (increasing 20% [95% CI: 7% to 35%] and 49% [95%  
308 CI: 20% to 85%], respectively). Additionally, a subgroup analysis found that the  
309 association between heavy moving and lifting with reduced fecundity was even more  
310 pronounced among overweight or obese women. Night shift work over the past year  
311 was not significantly associated with fecundity. Willis et al. (2019)<sup>55</sup> prospectively  
312 evaluated the association of shift work with fecundability. They followed North  
313 American women (living in Canada or the United States) who are not using  
314 contraception and aged 21–45 years attempting pregnancy for up to 12 months or until  
315 conception, using web-based surveys. Time to pregnancy was estimated by reports of  
316 their last menstrual period, usual menstrual cycle length, and the number of cycles they  
317 had attempted pregnancy at study entry. As a result, 6,873 women who had shift/night  
318 work ranging from 14.3% to 23.0% were included in the study. There was no

319 association between shift work and fecundability.

320

321 Stock et al. (2019)<sup>56</sup> prospectively evaluated the association between nurses'  
322 rotating night shift work (i.e., the number of months with at least three nights per month  
323 in the past two years) and menopausal age, using the data from an ongoing prospective  
324 cohort study (NHS 2). This cohort included 116,429 female registered nurses in the  
325 United States, aged between 25 to 42, at the baseline survey in 1989, followed from  
326 1991 through 2013. Participants were asked whether their menstrual periods had ceased,  
327 at what age, and if this was due to natural menopause, chemotherapy or radiation, or  
328 surgery. Of those whose menstrual periods had not stopped before the last follow-up,  
329 27,456 had natural menopause. The mean age of natural menopause in these women  
330 was 50 (SD  $\pm$ 4.0) years old. Among them, 2,524 had menopause at under 45 years old.  
331 Significant associations were found between the number of months of night shift work  
332 in the past two years and earlier menopause (HRs = 1.06 to 1.11 among women with  
333 <10 months, 10-19 months, and with  $\geq$ 20 months, compared to none of night shift  
334 work). Cumulative rotating night work of 10 or more years was also associated with a  
335 higher risk of menopause among women reaching menopause under age 45. These  
336 analyses did not consider any confounders such as psychological stress, job strain, or  
337 chronotype-related tolerance.

338

339 Schernhammer et al. (2011)<sup>58</sup> reported an association between rotating night shift  
340 work and endometriosis risk within the NHS2. Participants were asked whether they  
341 had ever had physician-diagnosed endometriosis. Analyses of incident diagnosis of  
342 endometriosis were restricted to those women who reported laparoscopic confirmation

343 of their diagnosis. This study included 2,062 laparoscopically confirmed cases  
344 documented during 16 years of follow-up evaluation from 89,400 women without  
345 diagnosed endometriosis at baseline. Overall, there was no association between rotating  
346 night shift work and endometriosis. When the cases were categorized by infertility  
347 status, the risk was elevated among women with concurrent infertility and  $\geq 5$  years of  
348 rotating night shift work (RR = 1.71 [95% CI: 1.18 to 2.49]; P for trend =0.005),  
349 compared with women with no rotating night shift work.

350

351 Michels et al. (2020)<sup>54</sup> examined the influences of night/shift work on the serum  
352 reproductive hormones. The participants were recruited in the United States from the  
353 BioCycle Study (2005–2007), a prospective cohort of 259 healthy women (mean age =  
354 24) not using oral contraceptives. At baseline, participants were asked if they were  
355 currently employed and if they worked nights or rotating shifts. Fasting blood samples  
356 were collected at eight clinic visits across each menstrual cycle. Fertility monitors were  
357 used to assist in the timing of mid-cycle clinic visits. Two cycles were followed. The  
358 proportion of participants who had night/shift work was 34.4%. The results showed that  
359 night/shift work did not influence estradiol or progesterone. Night/shift work showed  
360 lower testosterone (-9.9%) than employees without night/shift work, but the clinical  
361 implication of the finding was not mentioned.

362

### 363 **Risk of bias assessment**

364 The summary of the risk of bias assessment by ROBINS-I is shown in **Table 3**. The  
365 overall judgment was all “serious” due to confounding or selection of reported results.  
366 The certainty of evidence was judged to be very low for all outcomes, downgraded for

367 very serious risk of bias and publication bias (**Appendix 2**).

368

## 369 **Discussion**

### 370 **Principal Findings**

371 This review investigated the association between psychosocial factors at work  
372 and menstrual abnormalities or fertility by limiting the study design to longitudinal,  
373 assessing the outcome at baseline and follow-up. Of the six included studies, three  
374 showed non-significant associations of shift work with fertility.<sup>55,57,59</sup> Instead, high job  
375 demands, long working hours, and heavy lifting were significantly related.<sup>57,59</sup> Rotating  
376 night shift work was not associated with the onset of endometriosis,<sup>58</sup> but was with early  
377 menopause.<sup>56</sup> One study identified slight changes in the sex hormones by shift work.<sup>54</sup>  
378 All the studies had a serious risk of bias. There were still insufficient well-designed  
379 studies available to conduct meta-analysis and draw conclusions. However, the present  
380 study clarified the lack of evidence, achieved hypotheses to be examined in the future,  
381 and suggested further research directions.

382

### 383 **Comparison with Existing Literature**

384 All three studies<sup>55,57,59</sup> that investigated the risk of shift/night work for  
385 pregnancy outcomes showed non-significant associations. These studies were not  
386 included in the recent meta-analysis published in 2014<sup>19</sup> that examined the influence of  
387 shift work on reproductive outcomes, showing that shift work increased the risk of  
388 infertility (crude odds ratio [OR]: 1.80 [95%CI: 1.01- 3.20]). This meta-analysis  
389 included four cross-sectional fashioned studies (one study was a retrospective cohort)  
390 from 1996 to 2003.<sup>60-63</sup> These studies retrieved a pregnant population and obtained the



391 occupational data retrospectively. Three of them did not show significant  
392 associations,<sup>60-62</sup> and one did.<sup>63</sup> Certainly, some studies seemed to find that women with  
393 night/shift work tend to take a long time to become pregnant.<sup>60-62</sup> However, the  
394 significance disappeared after adjusting the demographic and job characteristics  
395 information. The adjusted results of the meta-analysis also showed non-significant  
396 associations (adjusted OR: 1.12 [0.86 – 1.44]).<sup>19</sup> From both our findings and previous  
397 reviews, we cannot conclude that shift/night work itself has an influence on fertility.  
398 More studies should be conducted using rigorous longitudinal study designs that  
399 account for possible confounding factors (psychosocial factors at work or lifestyle  
400 factors) to examine the association between shift work and fertility outcomes.

401

402 Two studies examined psychosocial factors at work other than shift/night work.  
403 These studies showed that high job demands, long working hours, and heavy lifting  
404 were significantly associated with infertility.<sup>57,59</sup> These findings were consistent with  
405 previous cross-sectional studies that were not included in the present review, which  
406 suggested that long working hours and physically demanding jobs lead to less ovarian  
407 function and infertility.<sup>21,61</sup> In contrast, another study reported a non-significant  
408 association.<sup>60</sup> Therefore, job demands, long time working, and lifting are possibly  
409 related to fertility outcomes. Although the previous study suggested that psychological  
410 stress reactions (i.e., depression, low positive affect) declined ovarian function,<sup>64</sup>  
411 whether these psychosocial factors at work affect fertility through such distress or not  
412 (direct impact) still needs examination. Psychological stress theoretically disrupts  
413 HPA-HPO axis interactions<sup>8</sup> and has been associated with higher levels of oxidative  
414 stress, which potentially declines ovarian function. However, there is a lack of evidence

415 to investigate the associations between psychosocial factors at work and fertility  
416 outcomes in a robust design. Further prospective studies will be expected in this area.

417

418 One study in this review showed the increased risk of early menopause from  
419 shift/night work.<sup>56</sup> Rotating night shift work experience in the prior 2 years increased  
420 the risk of earlier menopause. The subgroup analysis with women under 45 showed that  
421 over 10 years of cumulative rotating night shift work exposure increased the risk of  
422 early menopause.<sup>56</sup> This finding is consistent with the recent systematic review that  
423 included cross-sectional studies investigating job stress and menopause; the authors  
424 reported that age at menopause and severity of menopausal symptoms were both  
425 influenced by job-related factors such as high job strain. The review identified the risk  
426 factor for early menopause as smoking, type of work (e.g., service work), and shift work.  
427 Early menopause has been regarded as a significant outcome because it increases the  
428 risk of cardiovascular disease and all-cause mortality.<sup>65</sup> Further investigations are  
429 needed to prevent the deterioration of female workers' health if any occupational factors  
430 cumulatively affect early menopause. In this review, one study showed no significant  
431 association of rotating night shift work with the onset of endometriosis diagnosed by  
432 laparoscopy.<sup>58</sup> Night shift work was found to decrease melatonin levels,<sup>66</sup> reduced the  
433 aromatase activity and worked as a potential antiestrogenic agent.<sup>67</sup> Elevated estrogen  
434 levels caused by the low melatonin levels from night shift work could promote  
435 endometriosis growth. A population-based case-control study reported that any night  
436 shift work was associated with a 48% increased risk of endometriosis.<sup>68</sup> The authors of  
437 the included study discussed the possible bias that women with clinical pain symptoms  
438 or with children might be likely to be out of the workforce in rotating work.

439 Additionally, laparoscopic confirmation of endometriosis among those who never  
440 experienced infertility is restricted to those with clinical symptoms, leading to  
441 underestimating the risk in those who never experienced infertility. The associations of  
442 shift work with endometriosis still need further investigation.

443

444 No study investigated the association of psychosocial factors at work with  
445 menstrual abnormality using longitudinal data. This review was limited to studies that  
446 evaluated the outcome (menstrual abnormality) in both baseline and follow-up.  
447 Furthermore, studies were excluded that analyzed the menstrual cycle as one unit of  
448 outcome. No study that met these criteria was found in this review. Some studies  
449 analyzed the cycle data as one unit.<sup>14,16,22,34</sup> That method did not allow for a before/after  
450 comparison of data from one person and was considered a cross-sectional study.  
451 Menstrual abnormality can be caused not only by occupational stress but also by  
452 multiple other factors (e.g., body mass index [BMI], non-occupational stress). A  
453 longitudinal study evaluating the change in menstrual abnormalities will be needed to  
454 estimate the risk of psychosocial factors at work.

455

## 456 **Strengths and Limitations**

457 This systematic review was the first review to investigate the evidence of the  
458 associations between psychosocial factors at work and menstrual abnormalities or  
459 fertility, which limited the longitudinal well-designed studies. However, this systematic  
460 review has several limitations. First, we did not conduct a meta-analysis due to an  
461 insufficient number of studies. The concrete evidence thus was not provided for the  
462 clinical questions. Second, this review is limited by English and Japanese language

463 restriction; therefore, studies in other languages may have been missed. Third,  
464 publication bias may occur, but this review did not assess that bias.

465

#### 466 **Conclusions and Implications**

467 This systematic review investigated the association of psychosocial factors at work with  
468 menstrual abnormalities and fertility outcomes, and six articles were included. This  
469 review presented insufficient high-level evidence of well-designed studies on this topic.  
470 Because psychosocial factors at work are modifiable risk factors for women's  
471 reproductive outcomes, further investments are needed to determine the implications for  
472 occupational health practice.

473

#### 474 **Acknowledgements**

475 We extend great thanks to cooperated researcher Yumi ASAI for her support of our procedures of  
476 screening the literature.

477

478 **References**

- 479 1. Wang Y-X, Arvizu M, Rich-Edwards JW, et al. Menstrual cycle regularity and length  
480 across the reproductive lifespan and risk of premature mortality: prospective  
481 cohort study. *BMJ (Clinical research ed)*. 2020;371:m3464.
- 482 2. Kamdar BB, Tergas AI, Mateen FJ, Bhayani NH, Oh J. Night-shift work and risk of  
483 breast cancer: a systematic review and meta-analysis. *Breast cancer research and  
484 treatment*. 2013;138(1):291-301.
- 485 3. Tavani A, Ricci E, La Vecchia C, et al. Influence of menstrual and reproductive  
486 factors on ovarian cancer risk in women with and without family history of breast  
487 or ovarian cancer. *International journal of epidemiology*. 2000;29(5):799-802.
- 488 4. Solomon CG, Hu FB, Dunaif A, et al. Menstrual cycle irregularity and risk for future  
489 cardiovascular disease. *The Journal of Clinical Endocrinology & Metabolism*.  
490 2002;87(5):2013-2017.
- 491 5. Solomon CG, Hu FB, Dunaif A, et al. Long or highly irregular menstrual cycles as  
492 a marker for risk of type 2 diabetes mellitus. *Jama*. 2001;286(19):2421-2426.
- 493 6. Chrousos GP, Torpy DJ, Gold PW. Interactions between the  
494 hypothalamic-pituitary-adrenal axis and the female reproductive system: clinical  
495 implications. *Ann Intern Med*. 1998;129(3):229-240.
- 496 7. Magiakou MA, Mastorakos G, Webster E, Chrousos GP. The  
497 hypothalamic-pituitary-adrenal axis and the female reproductive system. *Annals  
498 of the New York Academy of Sciences*. 1997;816:42-56.
- 499 8. Lennartsson AK, Kushnir MM, Bergquist J, Billig H, Jonsdottir IH. Sex steroid  
500 levels temporarily increase in response to acute psychosocial stress in healthy  
501 men and women. *International journal of psychophysiology : official journal of  
502 the International Organization of Psychophysiology*. 2012;84(3):246-253.
- 503 9. László KD, Gyorffy Z, Adám S, Csoboth C, Kopp MS. Work-related stress factors and  
504 menstrual pain: a nation-wide representative survey. *Journal of psychosomatic  
505 obstetrics and gynaecology*. 2008;29(2):133-138.
- 506 10. Bariola E, Jack G, Pitts M, Riach K, Sarrel P. Employment conditions and  
507 work-related stressors are associated with menopausal symptom reporting among  
508 perimenopausal and postmenopausal women. *Menopause (New York, NY)*.  
509 2017;24(3):247-251.
- 510 11. Smith D, Wei N, Wang R. Subjective health complaints among female hospital nurses  
511 in Mainland China. *J Occup Health Safety (Aust NZ)*. 2005;21:51-59.
- 512 12. Hourani LL, Yuan HX, Bray RM. Psychosocial and Lifestyle Correlates of Premenstrual  
513 Symptoms among Military Women. *Journal of Womens Health*. 2004;13(7):812-821.

- 514 13. Messing K, Saurel-Cubizolles MJ, Bourguine M, Kaminski M. Menstrual-cycle  
515 characteristics and work conditions of workers in poultry slaughterhouses and  
516 canneries. *Scandinavian journal of work, environment & health*.  
517 1992;18(5):302-309.
- 518 14. Su SB, Lu CW, Kao YY, Guo HR. Effects of 12-hour rotating shifts on menstrual cycles  
519 of photoelectronic workers in Taiwan. *Chronobiol Int*. 2008;25(2):237-248.
- 520 15. Tissot F, Messing K. Perimenstrual Symptoms and Working Conditions Among Hospital  
521 Workers in Quebec. *American journal of industrial medicine*. 1995;27(4):511-522.
- 522 16. Fenster L, Waller K, Chen J, et al. Psychological Stress in the Workplace and  
523 Menstrual Function. *Am J Epidemiol*. 1999;149(2):127-134.
- 524 17. Gamble KL, Resuehr D, Johnson C. Shift work and circadian dysregulation of  
525 reproduction. *Frontiers in endocrinology*. 2013;4:92.
- 526 18. Sellix M, Menaker M. Circadian clocks in mammalian reproductive physiology:  
527 effects of the “other” biological clock on fertility. *Discovery medicine*.  
528 2011;11(59):273-281.
- 529 19. Stocker LJ, Macklon NS, Cheong YC, Bewley SJ. Influence of shift work on early  
530 reproductive outcomes: a systematic review and meta-analysis. *Obstet Gynecol*.  
531 2014;124(1):99-110.
- 532 20. Lim AJ, Huang Z, Chua SE, Kramer MS, Yong EL. Sleep Duration, Exercise, Shift Work  
533 and Polycystic Ovarian Syndrome-Related Outcomes in a Healthy Population: A  
534 Cross-Sectional Study. *PloS one*. 2016;11(11):e0167048.
- 535 21. Minguez-Alarcon L, Souter I, Williams PL, et al. Occupational factors and markers  
536 of ovarian reserve and response among women at a fertility centre. *Occup Environ*  
537 *Med*. 2017;74(6):426-431.
- 538 22. Albert-Sabater JA, Martinez JM, Baste V, Moen BE, Ronda-Perez E. Comparison of  
539 menstrual disorders in hospital nursing staff according to shift work pattern.  
540 *J Clin Nurs*. 2016;25(21-22):3291-3299.
- 541 23. Page MJ, McKenzie JE, Bossuyt PM, et al. The PRISMA 2020 statement: an updated  
542 guideline for reporting systematic reviews. *BMJ (Clinical research ed)*.  
543 2021;372:n71.
- 544 24. Sasaki N, Imamura K, Watanabe K, et al. Psychosocial Factors at Work and Menstrual  
545 Disorders: a Protocol for a Systematic Review and Meta-analysis. 2021;  
546 [https://assets.researchsquare.com/files/rs-179301/v1/48845b10-5ec4-4d48-8918-  
547 3dcf0e0edded.pdf?c=1631873381](https://assets.researchsquare.com/files/rs-179301/v1/48845b10-5ec4-4d48-8918-3dcf0e0edded.pdf?c=1631873381). Accessed 3 April 2022.
- 548 25. Eguchi H, Watanabe K, Kawakami N, et al. Psychosocial factors at work and  
549 inflammatory markers: protocol for a systematic review and meta-analysis. *BMJ open*.

- 550 2018;8(8):e022612.
- 551 26. Imamura K, Tsutsumi A, Asai Y, et al. Association between psychosocial factors  
552 at work and health outcomes after retirement: a protocol for a systematic review  
553 and meta-analysis. *BMJ open*. 2019;9(8):e030773.
- 554 27. Sakuraya A, Watanabe K, Kawakami N, et al. Work-related psychosocial factors and  
555 onset of metabolic syndrome among workers: a systematic review and meta-analysis  
556 protocol. *BMJ open*. 2017;7(6):e016716.
- 557 28. Watanabe K, Sakuraya A, Kawakami N, et al. Work-related psychosocial factors and  
558 metabolic syndrome onset among workers: a systematic review and meta-analysis.  
559 *Obes Rev*. 2018;19(11):1557-1568.
- 560 29. Soliman AM, Yang H, Du EX, Kelley C, Winkel C. The direct and indirect costs  
561 associated with endometriosis: a systematic literature review. *Human reproduction*  
562 (*Oxford, England*). 2016;31(4):712-722.
- 563 30. Cerqueira RO, Frey BN, Leclerc E, Brietzke E. Vitex agnus castus for premenstrual  
564 syndrome and premenstrual dysphoric disorder: a systematic review. *Archives of*  
565 *women's mental health*. 2017;20(6):713-719.
- 566 31. Chiaffarino F, Ricci E, Cipriani S, Chiantera V, Parazzini F. Cigarette smoking  
567 and risk of uterine myoma: systematic review and meta-analysis. *Eur J Obstet*  
568 *Gynecol Reprod Biol*. 2016;197:63-71.
- 569 32. Song JA, Lee MK, Min E, Kim ME, Fike G, Hur MH. Effects of aromatherapy on  
570 dysmenorrhea: A systematic review and meta-analysis. *Int J Nurs Stud*.  
571 2018;84:1-11.
- 572 33. Kim O, Ahn Y, Lee HY, et al. The Korea Nurses' Health Study: A Prospective Cohort  
573 Study. *Journal of women's health (2002)*. 2017;26(8):892-899.
- 574 34. Hjollund NH, Kold Jensen T, Bonde JP, et al. Job strain and time to pregnancy.  
575 *Scandinavian journal of work, environment & health*. 1998;24(5):344-350.
- 576 35. Schernhammer ES, Rosner B, Willett WC, Laden F, Colditz GA, Hankinson SE.  
577 Epidemiology of Urinary Melatonin in Women and Its Relation to Other Hormones and  
578 Night Work. *Cancer Epidem Biomar*. 2004;13(6):936-943.
- 579 36. Wang Y, Gu F, Deng M, et al. Rotating shift work and menstrual characteristics  
580 in a cohort of Chinese nurses. *BMC Womens Health*. 2016;16:24.
- 581 37. Jeyaseelan L, Rao PS. Effect of occupation on menstrual cycle length: causal model.  
582 *Hum Biol*. 1995;67(2):283-290.
- 583 38. Burdorf A, Brand T, Jaddoe VW, Hofman A, Mackenbach JP, Steegers EA. The effects  
584 of work-related maternal risk factors on time to pregnancy, preterm birth and birth  
585 weight: the Generation R Study. *Occup Environ Med*. 2011;68(3):197-204.

- 586 39. Wang XS, Travis RC, Reeves G, et al. Characteristics of the Million Women Study  
587 participants who have and have not worked at night. *Scandinavian journal of work,*  
588 *environment & health.* 2012;38(6):590-599.
- 589 40. Lawson CC, Johnson CY, Chavarro JE, et al. Work schedule and physically demanding  
590 work in relation to menstrual function: the Nurses' Health Study 3. *Scandinavian*  
591 *journal of work, environment & health.* 2015;41(2):194-203.
- 592 41. Taberner-Rico PM, Garcia-Velasco JA. Observational study of the social  
593 determinants of health in subfertile versus nonsubfertile women. *Journal of human*  
594 *reproductive sciences.* 2019;12(3):240.
- 595 42. Zhu JL, Knudsen LE, Andersen AM, Hjollund NH, Olsen J. Time to pregnancy among  
596 Danish laboratory technicians who were a part of the National Birth Cohort.  
597 *Scandinavian journal of work, environment & health.* 2005;31(2):108-114.
- 598 43. Potter J, Bouyer J, Trussell J, Moreau C. Premenstrual syndrome prevalence and  
599 fluctuation over time: results from a French population-based survey. *Journal of*  
600 *women's health (2002).* 2009;18(1):31-39.
- 601 44. Assadi SN. Is Being a Health-care Worker a Risk Factor for Women' s Reproductive  
602 System? *nternational Journal of Preventive Medicine.* 2013;4(7).
- 603 45. Gaskins AJ, Chavarro JE, Rich-Edwards JW, et al. Occupational use of high-level  
604 disinfectants and fecundity among nurses. *Scandinavian journal of work,*  
605 *environment & health.* 2017;43(2):171-180.
- 606 46. Sun S, Chen F. Women's employment trajectories during early adulthood in urban  
607 China: A cohort comparison. *Soc Sci Res.* 2017;68:43-58.
- 608 47. Geukes M, Anema JR, van Aalst MP, de Menezes RX, Oosterhof H. Improvement of  
609 menopausal symptoms and the impact on work ability: A retrospective cohort pilot  
610 study. *Maturitas.* 2019;120:23-28.
- 611 48. Kuczmierczyk AR, Labrum AH, Johnson CC. PERCEPTION OF FAMILY AND WORK ENVIRONMENTS  
612 IN WOMEN WITH PREMENSTRUAL SYNDROME. *Journal of psychosomatic research.*  
613 1992;36(8):787-795.
- 614 49. Davydov DM, Shapiro D, Goldstein IB, Chicz-DeMet A. Moods in everyday situations:  
615 effects of menstrual cycle, work, and stress hormones. *Journal of psychosomatic*  
616 *research.* 2005;58(4):343-349.
- 617 50. Weller L, Weller A, Koresh-Kamin H, Ben-Shoshan R. Menstrual synchrony in a sample  
618 of working women. *Psychoneuroendocrinology.* 1999;24(4):449-459.
- 619 51. Woods NF, Mitchell ES, Percival DB, Smith-DiJulio K. Is the menopausal transition  
620 stressful? Observations of perceived stress from the Seattle Midlife Women's  
621 Health Study. *Menopause (New York, NY).* 2009;16(1):90-97.



- 622 52. Dagher RK, McGovern PM, Dowd BE, Lundberg U. Postpartum depressive symptoms and  
623 the combined load of paid and unpaid work: a longitudinal analysis. *Int Arch Occup*  
624 *Environ Health*. 2011;84(7):735-743.
- 625 53. Lynch R, Lummaa V, Panchanathan K, et al. Integration involves a trade-off between  
626 fertility and status for World War II evacuees. *Nat Hum Behav*. 2019;3(4):337-345.
- 627 54. Michels KA, Mendola P, Schliep KC, et al. The influences of sleep duration,  
628 chronotype, and nightwork on the ovarian cycle. *Chronobiol Int*.  
629 2020;37(2):260-271.
- 630 55. Willis SK, Hatch EE, Wesselink AK, Rothman KJ, Mikkelsen EM, Wise LA. Female sleep  
631 patterns, shift work, and fecundability in a North American preconception cohort  
632 study. *Fertility and sterility*. 2019;111(6):1201-1210 e1201.
- 633 56. Stock D, Knight JA, Raboud J, et al. Rotating night shift work and menopausal age.  
634 *Human reproduction (Oxford, England)*. 2019;34(3):539-548.
- 635 57. Gaskins AJ, Rich-Edwards JW, Lawson CC, Schernhammer ES, Missmer SA, Chavarro JE.  
636 Work schedule and physical factors in relation to fecundity in nurses. *Occup*  
637 *Environ Med*. 2015;72(11):777-783.
- 638 58. Schernhammer ES, Vitonis AF, Rich-Edwards J, Missmer SA. Rotating nightshift work  
639 and the risk of endometriosis in premenopausal women. *Am J Obstet Gynecol*.  
640 2011;205(5):476 e471-478.
- 641 59. Barzilai-Pesach V, Sheiner EK, Sheiner E, Potashnik G, Shoham-Vardi I. The effect  
642 of women's occupational psychologic stress on outcome of fertility treatments.  
643 *Journal of occupational and environmental medicine*. 2006;48(1):56-62.
- 644 60. Spinelli A, Figà-Talamanca I, Osborn J. Time to pregnancy and occupation in a group  
645 of Italian women. *International journal of epidemiology*. 1997;26(3):601-609.
- 646 61. Tuntiseranee P, Olsen J, Geater A, Kor-anantakul O. Are long working hours and  
647 shiftwork risk factors for subfecundity? A study among couples from southern  
648 Thailand. *Occupational and Environmental Medicine*. 1998;55(2):99-105.
- 649 62. Zhu JL, Hjollund N, Boggild H, Olsen J. Shift work and subfecundity: a causal link  
650 or an artefact? *Occupational and environmental medicine*. 2003;60(9):e12-e12.
- 651 63. Bisanti L, Olsen J, Basso O, Thonneau P, Karmaus W. Shift work and subfecundity:  
652 a European multicenter study. *Journal of occupational and environmental medicine*.  
653 1996;38(4):352-358.
- 654 64. Bleil ME, Adler NE, Pasch LA, et al. Depressive symptomatology, psychological  
655 stress, and ovarian reserve: a role for psychological factors in ovarian aging?  
656 *Menopause (New York, NY)*. 2012;19(11):1176.
- 657 65. Muka T, Oliver-Williams C, Kunutsor S, et al. Association of age at onset of

- 658           menopause and time since onset of menopause with cardiovascular outcomes,  
659           intermediate vascular traits, and all-cause mortality: a systematic review and  
660           meta-analysis. *JAMA cardiology*. 2016;1(7):767-776.
- 661 66.       Burch JB, Yost MG, Johnson W, Allen E. Melatonin, sleep, and shift work adaptation.  
662           *Journal of occupational and environmental medicine*. 2005;47(9):893-901.
- 663 67.       Cos S, Martínez - Campa C, Mediavilla MD, Sánchez - Barceló EJ. Melatonin modulates  
664           aromatase activity in MCF - 7 human breast cancer cells. *Journal of pineal research*.  
665           2005;38(2):136-142.
- 666 68.       Marino JL, Holt VL, Chen C, Davis S. Shift work, hCLOCK T3111C polymorphism, and  
667           endometriosis risk. *Epidemiology (Cambridge, Mass)*. 2008;19(3):477.
- 668

**Table 1 Eligibility criteria in the present systematic review**

|              | Inclusion criteria                                                                                                                                                                                                                                                                                                                                                                                                                                              | Exclusion criteria                                                                                                                                                                         |
|--------------|-----------------------------------------------------------------------------------------------------------------------------------------------------------------------------------------------------------------------------------------------------------------------------------------------------------------------------------------------------------------------------------------------------------------------------------------------------------------|--------------------------------------------------------------------------------------------------------------------------------------------------------------------------------------------|
| Design       | <ul style="list-style-type: none"> <li>● Longitudinal or prospective cohort design</li> </ul>                                                                                                                                                                                                                                                                                                                                                                   | <ul style="list-style-type: none"> <li>● Outcome was not assessed at least at two time point.</li> <li>● Menstrual cycle was cross-sectionally analyzed as an independent unit.</li> </ul> |
| Participants | <ul style="list-style-type: none"> <li>● Adult female workers (over 18 years old)</li> </ul>                                                                                                                                                                                                                                                                                                                                                                    | <ul style="list-style-type: none"> <li>● Pregnant workers</li> <li>● Clinical students</li> </ul>                                                                                          |
| Exposures    | <ul style="list-style-type: none"> <li>● Presence of adverse psychosocial factors at work</li> </ul>                                                                                                                                                                                                                                                                                                                                                            | N/A                                                                                                                                                                                        |
| Comparisons  | <ul style="list-style-type: none"> <li>● Absence of adverse psychosocial factors at work</li> </ul>                                                                                                                                                                                                                                                                                                                                                             | N/A                                                                                                                                                                                        |
| Outcomes     | <ul style="list-style-type: none"> <li>● Menstrual disorders and related symptoms: 1) diverse menstrual dysfunctions (e.g., cycle disorder, hypermenorrhea), 2) gynecological disease/syndrome (e.g., endometriosis, polycystic ovarian syndrome), 3) menstrual-related symptoms (e.g., PMS, menopausal symptoms)</li> <li>● Reproductive outcomes (e.g., infertility, time to be pregnant)</li> <li>● Biological outcomes (e.g., serum sex hormone)</li> </ul> | <ul style="list-style-type: none"> <li>● Pregnancy-related outcomes (e.g., premature birth)</li> <li>● Malignant outcomes (e.g., cancer)</li> </ul>                                        |
| Article type | <ul style="list-style-type: none"> <li>● Original article published by peer-reviewed journal (including advanced online publication)</li> </ul>                                                                                                                                                                                                                                                                                                                 | <ul style="list-style-type: none"> <li>● Conference abstract</li> <li>● Letter/correspondence</li> </ul>                                                                                   |
| Language     | <ul style="list-style-type: none"> <li>● Written in English or Japanese</li> </ul>                                                                                                                                                                                                                                                                                                                                                                              | N/A                                                                                                                                                                                        |

**Table 2. The descriptions of the included studies (N=6).**

| 1 <sup>st</sup> author, year, (country) | Design (cohort name, duration)                     | Baseline N (N for analysis) | Participants                                                                                                                                                                                                                                                    | Exposure                                                                                                                            | Comparison                           | Outcome                                                                                      | F/U (%)                                                                                                                               | Main results                                                                                                                                                                                                                                                  |
|-----------------------------------------|----------------------------------------------------|-----------------------------|-----------------------------------------------------------------------------------------------------------------------------------------------------------------------------------------------------------------------------------------------------------------|-------------------------------------------------------------------------------------------------------------------------------------|--------------------------------------|----------------------------------------------------------------------------------------------|---------------------------------------------------------------------------------------------------------------------------------------|---------------------------------------------------------------------------------------------------------------------------------------------------------------------------------------------------------------------------------------------------------------|
| Michels KA., 2020 (U.S.)                | Prospective cohort (The BioCycle Study, 2005–2007) | 259 (259)                   | Healthy, regularly menstruating women aged 18–44 years, who did not use oral contraceptives, other medications or vitamins; had not been pregnant in the last six months; did not have any diagnoses of chronic conditions; did not have gynecologic surgeries. | With night/shift work.                                                                                                              | Without night/shift work.            | Reproductive hormone                                                                         | Eight times across one to two menstrual cycle (100%)                                                                                  | Women reporting night/shift work (n = 77) had lower testosterone (percent difference = -9.9% [95% CI: -18.4 to -0.4]). No significant relationship in estradiol, ovulatory LH, FSH, ovulatory FSH, luteal progesterone, and the risk of sporadic anovulation. |
| Willis SK., 2019 (Canada and U.S.)      | Prospective cohort (PRESTO)                        | 8,772 (6,873)               | Women aged 21 to 45 years, attempting pregnancy, who are not using contraception or fertility treatment.                                                                                                                                                        | Working rotating shifts (hours that shift in a predictable way from day-to-day, week-to-week, or month-to-month) in the past month. | No night/shift work                  | Fecundability (per-cycle probability of conception)                                          | Every 8 weeks or until reported conception, initiation of fertility treatment, cessation of pregnancy attempts. (86.2% <sup>a</sup> ) | No association between shift work and fecundability.                                                                                                                                                                                                          |
| Stock D., 2019 (U.S.)                   | Prospective cohort (NHS2 1989-2011)                | 116,429 (80,840)            | Female registered nurses between ages 25 and 42, who did not experience natural or medically induced menopause; did not use menopausal hormone therapy (HT), or did not                                                                                         | Rotating night shift (recent number of months worked rotating night shifts, which defined as working                                | Never worked on rotating nightshifts | Age at natural menopause over 22 years of follow-up/ earlier menopause younger than 45 years | Every 2 years follow-up questionnaires were sent to cohort members. Response rates to the                                             | Women who had worked 10–19 months of rotating night shifts had the largest point estimate (HR = 1.11 [95% CI: 1.01 to 1.21]) and women who had worked ≥20 months had similar result (HR = 1.09 [95% CI:                                                       |

|                                     |                                     |                |                                                             |                                                                                                                                                                                                                                                                                                                                                                                                      |                                                                                                                                                                                                                                                                                                                                                                         |                                                          |                                                                         |                                                                                                                                                                                                                                                                                                                                                                                                                                                                                                                                                                                     |
|-------------------------------------|-------------------------------------|----------------|-------------------------------------------------------------|------------------------------------------------------------------------------------------------------------------------------------------------------------------------------------------------------------------------------------------------------------------------------------------------------------------------------------------------------------------------------------------------------|-------------------------------------------------------------------------------------------------------------------------------------------------------------------------------------------------------------------------------------------------------------------------------------------------------------------------------------------------------------------------|----------------------------------------------------------|-------------------------------------------------------------------------|-------------------------------------------------------------------------------------------------------------------------------------------------------------------------------------------------------------------------------------------------------------------------------------------------------------------------------------------------------------------------------------------------------------------------------------------------------------------------------------------------------------------------------------------------------------------------------------|
|                                     |                                     |                | have cancer diagnosis (excluding non-melanoma skin cancer). | sometime between midnight and 2 AM).                                                                                                                                                                                                                                                                                                                                                                 |                                                                                                                                                                                                                                                                                                                                                                         |                                                          | NHS 2 questionnaire s have been at 90% throughout the follow-up period. | 1.02 to 1.16]). Cumulative rotating night work of 10 or more years was also associated with a higher risk of menopause among women reaching menopause under age 45 (HR <sub>10-19 years</sub> = 1.22 [95% CI: 1.03 to 1.44]; HR <sub>≥20 years</sub> = 1.73 [95% CI: 0.90 to 3.35]).                                                                                                                                                                                                                                                                                                |
| Gaskins AJ., 2015 (U.S. and Canada) | Prospective cohort (NHS3 2014-2017) | 38,016 (1,739) | Female registered nurses trying to get pregnant.            | Typical work schedule over past year (evenings only/ nights only/ rotating with nights/ rotating no nights); weekly hours of nursing work over past year (1-20h/ >40h); frequency of night work in past month (≤1/ 2-3/ >3); duration of rotating night shifts (<1y/ 1-2y/ >3y); duration of permanent night shifts (<1y/ 1-2y/ >3y); duration of night shifts (<1y/ 1-1.9y/ 2-4y/ >4y); duration of | Typical work schedule over past year (days only); weekly hours of nursing work over past year (21-40h); frequency of night work in past month (none); duration of rotating night shifts (never); duration of permanent night shifts (never); duration of night shifts (never); duration of standing/walking (5-8h); frequency of moving or lifting a heavy load (none). | The current duration of their ongoing pregnancy attempt. | Every 6 months (no data available)                                      | Working over 40 hours per week was related to increasing 20% (95% CI 7% to 35%) the median duration of pregnancy attempt compared to working 21-40 h/week (p =0.006). After adjustment for demographic and work-related confounders, women lifting or moving a heavy load >15 times per day had a 49% (95% CI 20% to 85%) longer median duration of pregnancy attempt (p =0.002). Typical work schedules over the past year, frequency of night work in the past month and duration of rotating or non-rotating night shifts were not also significantly associated with fecundity. |

|                                   |                                       |                |                                                                                                                                                          |                                                                                                                                                                                         |                                                                                        |                                                                      |                                                                                                                                                                                     |                                                                                                                                                                                                                                                                                                                                                                                                                                                                                                                                                          |
|-----------------------------------|---------------------------------------|----------------|----------------------------------------------------------------------------------------------------------------------------------------------------------|-----------------------------------------------------------------------------------------------------------------------------------------------------------------------------------------|----------------------------------------------------------------------------------------|----------------------------------------------------------------------|-------------------------------------------------------------------------------------------------------------------------------------------------------------------------------------|----------------------------------------------------------------------------------------------------------------------------------------------------------------------------------------------------------------------------------------------------------------------------------------------------------------------------------------------------------------------------------------------------------------------------------------------------------------------------------------------------------------------------------------------------------|
| Schernhammer ES., 2011 (US)       | Prospective cohort (NHS 2, 1989-2005) | 89,400 (2,062) | Female registered nurses of ages 25-42 years, without the diagnosis of endometriosis or a history of infertility at baseline.                            | standing/walking (0 or less than 1h/ 1-4h/ >8h); frequency of moving or lifting a heavy load (1-5/ 6-15/ >15 times).<br>Duration of work on rotating nightshift (1-4.9yr / $\geq$ 5yr). | Never worked on rotating nightshifts.                                                  | Diagnosis of endometriosis by laparoscopic confirmation.             | Every 2 years, follow-up questionnaires were sent to cohort members. Response rates to the NHS II questionnaires have been at 90% throughout the follow-up period. 18 months (100%) | Overall, there was no association between rotating nightshift work and risk of endometriosis. When the cases were categorized by infertility status, risk was elevated among women with concurrent infertility and $\geq$ 5 years of rotating nightshift work (RR = 1.71 [95% CI: 1.18 to 2.49]; P for trend =0.005), compared with women with no rotating nightshift work. Women with high job demand were less likely to conceive (RR = 0.60 [95% CI: 0.42 to 0.96]). No significant association of decision latitude, nor shift work with conception. |
| Barzilai-Pesach V., 2006 (Israel) | Prospective cohort (1999-2000).       | 160 (75)       | Female working patients with a fertility problem, who attended the Fertility and In-Vitro Fertilization clinics at the Soroka University Medical Center. | Job demands (high), type of job (full-time job), decision latitude (minimal), shift work (yes).                                                                                         | Job demands (low), Type of job (part-time), decision latitude (high), shift work (no). | Conception in which the data was obtained from the clinical records. |                                                                                                                                                                                     |                                                                                                                                                                                                                                                                                                                                                                                                                                                                                                                                                          |

a. The authors calculated from the data described in the paper (5926/6873\*100).

NHS: The Nurses' Health Study. PRESTO: Pregnancy Study Online

**Table 3. Summary of risk of bias assessment for the included studies analyzed by ROBINS-I (N=6).**

|                                           | Michels et al<br>(2020) #3722 | Willis et al.<br>(2019) #4093 | Stock et al.<br>(2019) #4307 | Gaskins et al.<br>(2015)#7240 | Schernhammer<br>et al.<br>(2011)#9737 | Barzilai-Pesach<br>et al.<br>(2006)#11436 |
|-------------------------------------------|-------------------------------|-------------------------------|------------------------------|-------------------------------|---------------------------------------|-------------------------------------------|
| 1. Confounding                            | S                             | S                             | M                            | S                             | S                                     | S                                         |
| 2. Selection of Participants              | L                             | L                             | L                            | L                             | S                                     | S                                         |
| 3. Classification of intervention         | M                             | M                             | M                            | M                             | S                                     | S                                         |
| 4. Deviations from intended interventions | L                             | L                             | L                            | L                             | L                                     | L                                         |
| 5. Missing data                           | S                             | M                             | S                            | L                             | S                                     | S                                         |
| 6. Measurement of outcomes                | L                             | S                             | S                            | S                             | L                                     | L                                         |
| 7. Selection of reported result           | S                             | M                             | S                            | S                             | S                                     | S                                         |
| Overall judgment                          | S                             | S                             | S                            | S                             | S                                     | S                                         |

Note: L: low risk of bias, M: moderate risk of bias, S: serious risk of bias, C: critical risk of bias, N: no information

ROBINS-I: The risk of bias in observational studies of exposures

## Identification of studies via databases

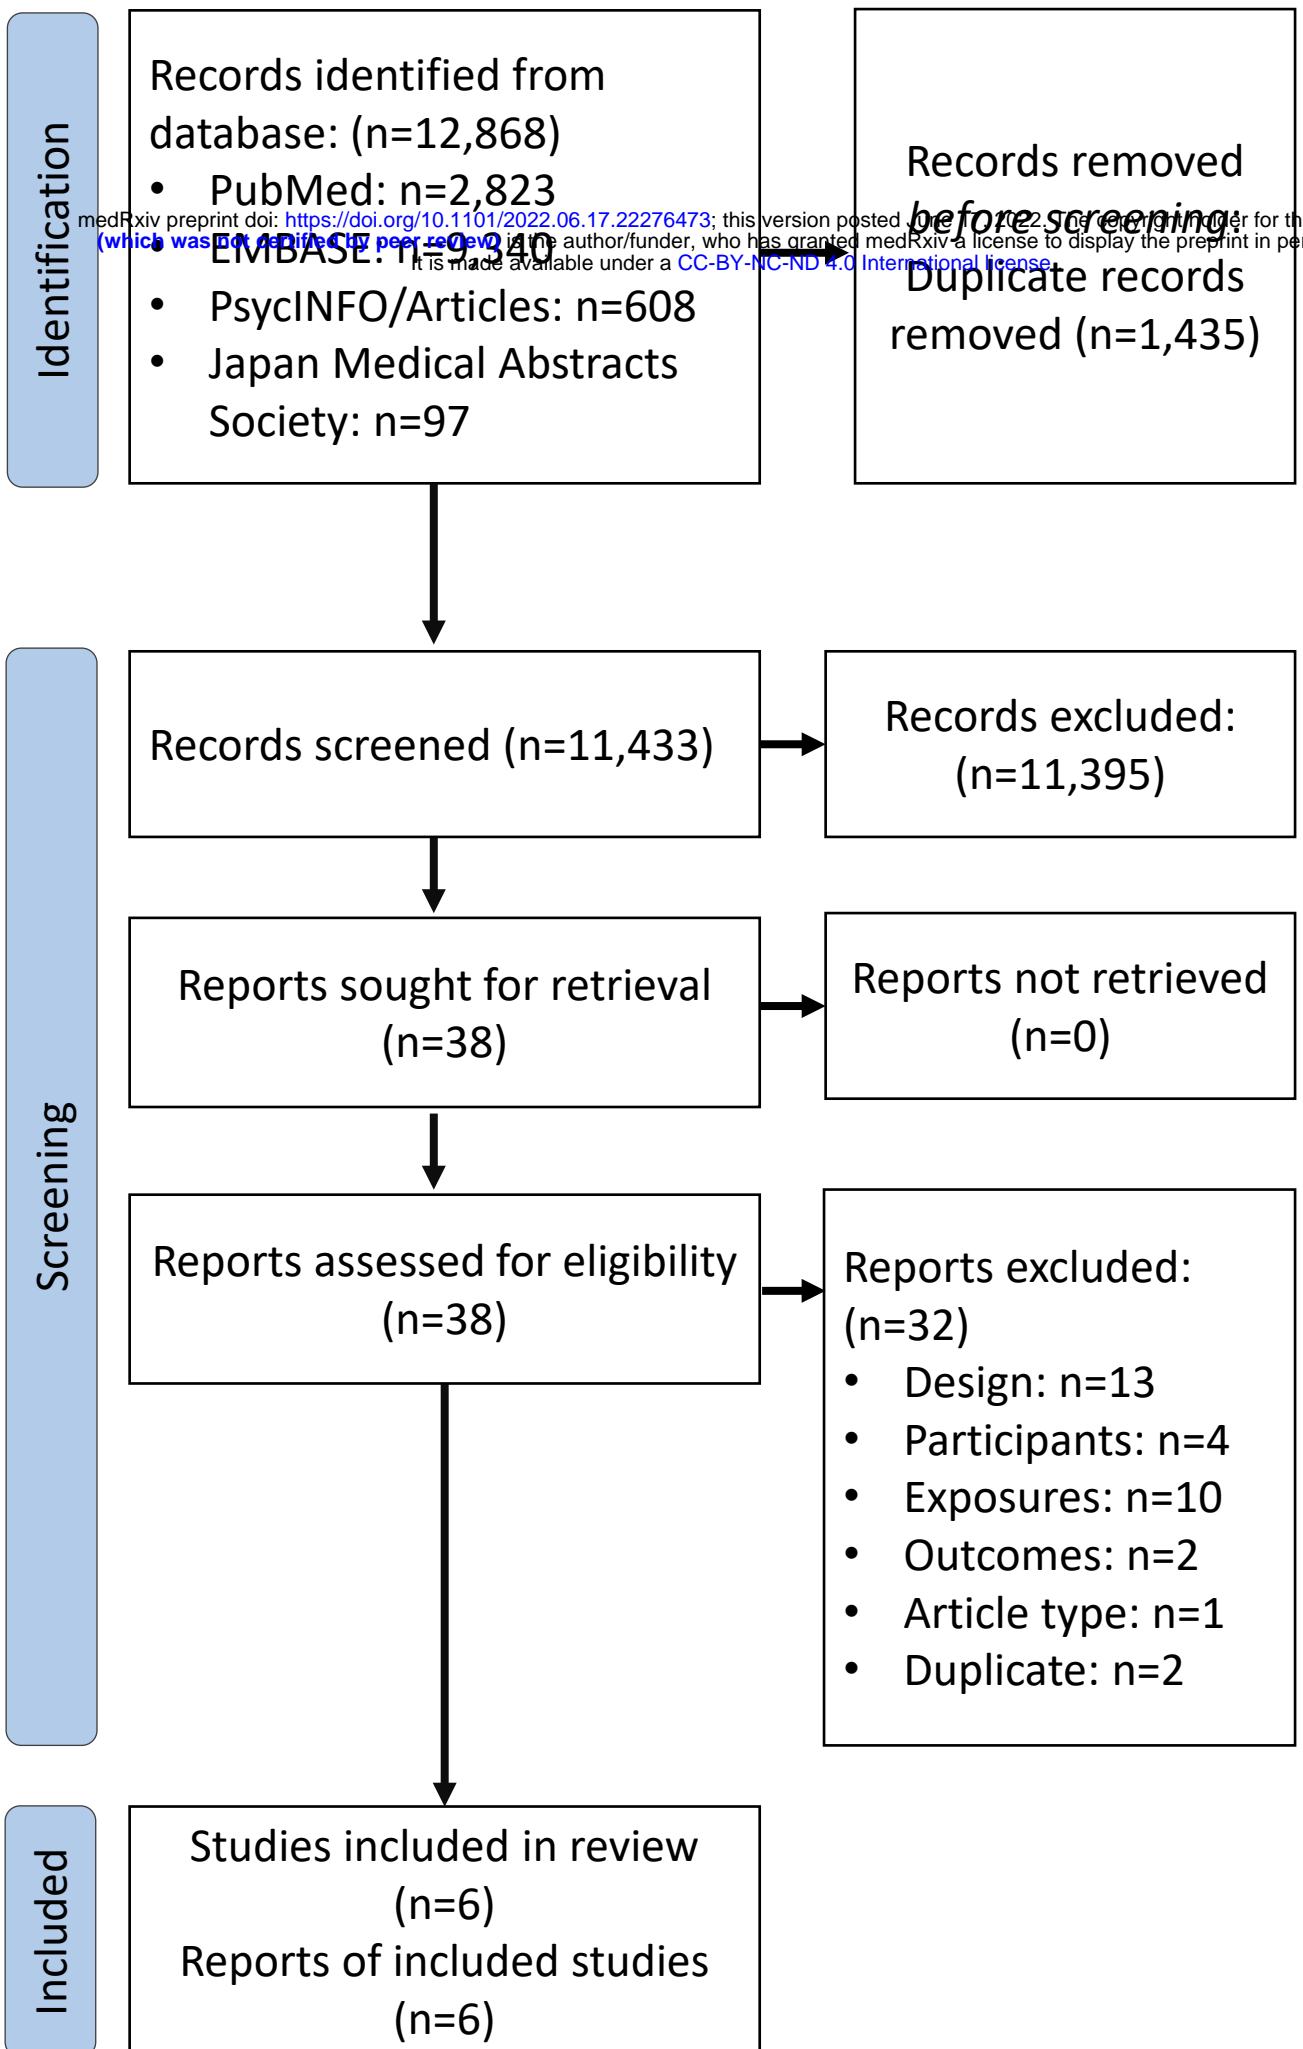

Figure 1 PRISMA 2020 Flow Diagram of systematic review search results.



## Appendix 1

Search terms for PubMed

(employe\*[tw] OR manag\*[tw] OR colleague\*[tw] OR worksit\*[tw] OR "work"[tw] OR works\*[tw] OR work\*[tw] OR worka\*[tw] OR worke\*[tw] OR workg\*[tw] OR worki\*[tw] OR workl\*[tw] OR workp\*[tw] OR occupant\*[tw] OR company\*[tw] OR offic\*[tw] OR busines\*[tw] OR workplace[mh]) AND (("Stress, Mechanical"[Mesh] OR "Lifting"[Mesh] OR "Moving and Lifting Patients"[Mesh] OR "Weight-Bearing"[Mesh] OR "Biomechanics" OR "Physical Exertion"[Mesh] OR "Torsion, Mechanical"[Mesh] OR "Postural Balance"[Mesh] OR "Walking"[Mesh] OR "Recovery of Function"[Mesh] OR "Relaxation"[Mesh] OR (static[Title/Abstract] AND posture) OR (awkward[Title/Abstract] AND posture) OR (dynamic[Title/Abstract] AND posture) OR static work[Title/Abstract] OR dynamic load\*[Title/Abstract] OR lift\*[Title/Abstract] OR carry\*[Title/Abstract] OR hold\*[Title/Abstract] OR pull\*[Title/Abstract] OR drag\*[Title/Abstract] OR push\*[Title/Abstract] OR manual handling[Title/Abstract] OR force\*[Title/Abstract] OR biomechanic\*[Title/Abstract] OR walking\*[Title/Abstract] OR postural balance[Title/Abstract] OR flexion\*[Title/Abstract] OR extension\*[Title/Abstract] OR turning[Title/Abstract] OR sitting[Title/Abstract] OR kneeling[Title/Abstract] OR squatting[Title/Abstract] OR twisting[Title/Abstract] OR bending[Title/Abstract] OR reaching[Title/Abstract] OR standing[Title/Abstract] OR sedentary[Title/Abstract] OR repetitive movement\*[Title/Abstract] OR monotonous work[Title/Abstract] OR relaxation[Title/Abstract] OR recovery of function[Title/Abstract] OR physical demand\*[Title/Abstract] OR physically demand\*[Title/Abstract]) OR ("Stress, Psychological"[Majr] OR "Social Support"[Majr] OR "Job Satisfaction"[Mesh] OR "Work Schedule Tolerance"[Mesh] OR "Employee Performance Appraisal"[Mesh] OR "Employee Grievances"[Mesh] OR "Social Justice/psychology"[Mesh] OR "Personnel Downsizing"[Mesh] OR "Staff Development"[Mesh] OR "Organizational Culture"[Mesh] OR "Bullying"[Mesh] OR "Prejudice"[Mesh] OR "Social Discrimination"[Mesh] OR "Interpersonal Relations"[Mesh] OR "Communication/psychology"[Mesh]) OR (psychosocial[Title/Abstract] OR job strain[Title/Abstract] OR work strain[Title/Abstract] OR work demand\*[Title/Abstract] OR job demand\*[Title/Abstract] OR high demand\*[Title/Abstract] OR low control[Title/Abstract] OR lack of control[Title/Abstract] OR work control[Title/Abstract] OR job control[Title/Abstract] OR decision latitude[Title/Abstract] OR work influence\*[Title/Abstract] OR demand resource\*[Title/Abstract] OR effort reward\*[Title/Abstract] OR time pressure\*[Title/Abstract] OR recuperation\*[Title/Abstract] OR work overload\*[Title/Abstract] OR work over-load\*[Title/Abstract] OR recovery[Title/Abstract] OR coping[Title/Abstract] OR work ability[Title/Abstract] OR social support[Title/Abstract] OR support system\*[Title/Abstract] OR

social network\*[Title/Abstract] OR emotional support[Title/Abstract] OR interpersonal relation\*[Title/Abstract] OR interaction\*[Title/Abstract] OR social capital [Title/Abstract] OR justice\*[Title/Abstract] OR injustice\*[Title/Abstract] OR job satisfaction[Title/Abstract] OR work satisfaction[Title/Abstract] OR boredom[Title/Abstract] OR skill discretion\*[Title/Abstract] OR staff development[Title/Abstract] OR discrimination[Title/Abstract] OR harass\*[Title/Abstract] OR work-place conflict\*[Title/Abstract] OR workplace violen\*[Title/Abstract] OR work-place violen\*[Title/Abstract] OR bullying[Title/Abstract] OR ageism[Title/Abstract] OR homophobia[Title/Abstract] OR racism[Title/Abstract] OR sexism[Title/Abstract] OR victimization\*[Title/Abstract] OR silent workplace\*[Title/Abstract] OR role ambiguity[Title/Abstract] OR role-conflict\*[Title/Abstract] OR work-role\*[Title/Abstract] OR working hour\*[Title/Abstract] OR working time[Title/Abstract] OR day-time[Title/Abstract] OR night-time[Title/Abstract] OR shift work\*[Title/Abstract] OR work shift\*[Title/Abstract] OR temporary work[Title/Abstract] OR full-time[Title/Abstract] OR part-time[Title/Abstract] OR flexible work\*[Title/Abstract] OR organizational change[Title/Abstract] OR organisational change[Title/Abstract] OR lean production[Title/Abstract] OR job security[Title/Abstract] OR job insecurity[Title/Abstract])) AND (menstruation OR menstrual OR “menstrual pain” OR “period pain” OR “period pains” OR menorrhagia OR hypermenorrhea OR dysmenorrhea[MeSH] OR premenstrual OR “PMS” OR “premenstrual syndrome” OR “PMDD” OR “premenstrual dysphoric disorder” OR amenorrhea OR menoxenia OR metrorrhagia OR endometrio\* OR myoma\* OR leiomyoma OR fibroids OR adenomyosis OR ovarian cyst\* OR endometrioma OR polycystic ovar\* OR menopaus\* OR hot flush\* OR climacteric OR estrogen\* OR estradiol OR progesterone\* OR prolactin OR lutenizing OR LH OR “lutenizing hormone” OR follicul\* OR FSH OR “follicle stimulating hormone” OR gonadotropin OR GnRH OR “gonadotropin releasing hormone” OR “basal body temperature” OR infertility OR fertility OR fecund\* OR subfecundity OR reproductiv\*) AND (longitudinal OR prospective OR cohort OR (follow AND up) OR observational OR (case AND (control or cohort)) OR case-control OR case-cohort)

## Appendix 2: GRADE overview.

| Quality Assessment                |              |                 |                 |                      |                           |                             |
|-----------------------------------|--------------|-----------------|-----------------|----------------------|---------------------------|-----------------------------|
| Studies                           | Risk of Bias | Inconsistency   | Indirectness    | Imprecision          | Publication bias          | Overall Quality of Evidence |
| <b>Fecundability</b>              |              |                 |                 |                      |                           |                             |
| 3 studies <sup>a</sup>            | Very serious | Not serious     | Not serious     | Serious <sup>c</sup> | Very serious <sup>g</sup> | <b>Very low quality</b>     |
| <b>Diagnosis of endometriosis</b> |              |                 |                 |                      |                           |                             |
| 1 study <sup>b</sup>              | Very serious | NA <sup>f</sup> | NA <sup>f</sup> | NA <sup>f</sup>      | Very serious <sup>g</sup> | <b>Very low quality</b>     |
| <b>Age at natural menopause</b>   |              |                 |                 |                      |                           |                             |
| 1 study <sup>c</sup>              | Very serious | NA <sup>f</sup> | NA <sup>f</sup> | NA <sup>f</sup>      | Very serious <sup>g</sup> | <b>Very low quality</b>     |
| <b>Reproductive hormone</b>       |              |                 |                 |                      |                           |                             |
| 1 study <sup>d</sup>              | Very serious | NA <sup>f</sup> | NA <sup>f</sup> | NA <sup>f</sup>      | Very serious <sup>g</sup> | <b>Very low quality</b>     |

<sup>a</sup> Willis SK., 2019; Gaskins AJ., 2015; Barzilai-Pesach V., 2006.

<sup>b</sup> Schernhammer ES., 2011.

<sup>c</sup> Stock D., 2019.

<sup>d</sup> Michels KA., 2020.

<sup>e</sup> one study has small sample size

<sup>f</sup> not applicable since no pooled estimate was calculated heterogeneity

<sup>g</sup> no protocol available
